# Supplementary material for: Telerehabilitation Approaches for People with Chronic Heart Failure: A Systematic Review and Meta-Analysis
Source: MDPI journal article supplement (doi:10.3390/jcm12010064), 2022-12-21
Supplement: s1 [file s1]

# Telerehabilitation Approaches for People with Chronic Heart Failure: A Systematic Review and Meta-Analysis

Sara Isernia <sup>1</sup>, Chiara Pagliari <sup>1,\*</sup>, Nuccia Morici <sup>1</sup>, Anastasia Toccafondi <sup>1</sup>, Paolo Innocente Banfi <sup>1</sup>,  
Federica Rossetto <sup>1</sup>, Francesca Borgnis <sup>1</sup>, Monica Tavanelli <sup>1</sup>, Lorenzo Brambilla <sup>2</sup>,  
Francesca Baglio <sup>1</sup> and on behalf of the CPTM Group <sup>†</sup>

<sup>1</sup> IRCCS Fondazione Don Carlo Gnocchi ONLUS, 20148 Milan, Italy  
<sup>2</sup> IRCCS Fondazione Don Carlo Gnocchi ONLUS, 50143 Florence, Italy  
\* Correspondence: cpagliari@dongnocchi.it  
<sup>†</sup> CPTM Group members are listed in the Acknowledgment section.

Table S1. Inclusion and exclusion criteria of the selected papers.

| Study | Inclusion Criteria                                                                                          | Exclusion Criteria                                                                                                                                                                                                                                                                                                                                              |
|-------|-------------------------------------------------------------------------------------------------------------|-----------------------------------------------------------------------------------------------------------------------------------------------------------------------------------------------------------------------------------------------------------------------------------------------------------------------------------------------------------------|
| [18]  | Left ventricular systolic dysfunction; clinically stable for at least 1 month; optimized medication dosages | Significant ischaemic symptoms at low workloads; uncontrolled diabetes; acute systemic illness or fever; recent embolism; active pericarditis or myocarditis; moderate to severe aortic stenosis; regurgitant valvular heart disease requiring surgery; myocardial infarction within the past 3 onsets atrial fibrillation; decompensation; other comorbidities |
| [19]  | Diagnosis of chronic heart failure; clinical heart failure symptoms; >18 years                              | Outlined by the Australian exercise guidelines criteria and no criteria (such as security parameters) to perform home-based telerehabilitation                                                                                                                                                                                                                  |
| [20]  | Diagnosis of chronic heart failure (New York Heart                                                          |                                                                                                                                                                                                                                                                                                                                                                 |

|      |                                                                                                                                                                                                                                                                                                                                                                                    |                                                                                                                                                                                                                                                                                                                                                                                                                                                                                                                                                                                                                                       |
|------|------------------------------------------------------------------------------------------------------------------------------------------------------------------------------------------------------------------------------------------------------------------------------------------------------------------------------------------------------------------------------------|---------------------------------------------------------------------------------------------------------------------------------------------------------------------------------------------------------------------------------------------------------------------------------------------------------------------------------------------------------------------------------------------------------------------------------------------------------------------------------------------------------------------------------------------------------------------------------------------------------------------------------------|
|      | Association functional classification II–III) with physical frailty above pre-frailty.                                                                                                                                                                                                                                                                                             | Inability to perform 6MWT due to locomotor disorders or other reasons;<br>chronic kidney disease (estimated glomerular filtration rate < 30 mL/min/1.73 m <sup>2</sup> ), pericardial disease, severe valvular disease, severe cognitive decline, 6MWD ≥ 550 m; ambulatory cardiological rehabilitation more than twice a week; readmission for acute exacerbation of HF within 1 month; absence of own smartphone; judged by the investigator as being ineligible for other reasons; BMI ≥ 25 kg/m <sup>2</sup>                                                                                                                      |
| [21] | Diagnosis of chronic heart failure for at least 3 months; >18 years; stable condition with a medical regimen for at least 4 weeks; skillful in using Wechat or QQ software via a smartphone; discharged to home; Chinese spoken                                                                                                                                                    | Myocardial infarction within the last month, unstable angina, uncontrolled hypertension, severe respiratory diseases, decompensated non-cardiac disease, malignancy, physical disability, mental disease                                                                                                                                                                                                                                                                                                                                                                                                                              |
| [22] | Left ventricular systolic heart failure diagnosed at least for 3 months; left ventricular ejection fraction <40% on echocardiography in class II or III according to the New York Heart Association (NYHA); clinically stable and stable medication regimen for at least 4 weeks; skillful in using a computer, tablet or smartphone                                               | Unstable angina; acute coronary syndrome within the last month, coronary artery bypass grafting within the last 2 months, initiation of CRT-P or CRT-D within the last 6 months, implantation of a pacemaker and/or ICD within the last 6 weeks; symptomatic and/or exercise-induced cardiac arrhythmia; heart disease requiring surgical treatment; hypertrophic cardiomyopathy; severe pulmonary disease; uncontrolled hypertension; anemia; acute and/or decompensated noncardiac disease; physical disability or neurological problems; acute or chronic inflammatory disease; severe psychiatric disorder; denied to participate |
| [23] | Left ventricular systolic chronic heart failure diagnosed at least for 3 months; with a left ventricular ejection fraction (LVEF) < 40% on echocardiography in class II or III according to the New York Heart Association (NYHA); clinically stable and receiving an optimal and stable medication regimen for at least 4 weeks; no contraindications to cardiopulmonary training | Unstable angina; acute coronary syndrome within the last month, coronary artery bypass grafting within the last 2 months, initiation of CRT-P or CRT-D within the last 6 months, implantation of a pacemaker and/or ICD within the last 6 weeks; symptomatic and/or exercise-induced cardiac arrhythmia; heart disease requiring surgical treatment; hypertrophic cardiomyopathy; severe pulmonary disease; uncontrolled hypertension; anemia; acute and/or decompensated noncardiac disease; physical disability or neurological problems; acute or chronic inflammatory disease; severe psychiatric disorder; denied to participate |

|      |                                                                                                                                                                                                                                                                                                                                           |                                                                                                                                                                                                                                                                                                                                                                                                                                                                                                                                                                                                                                                                                                            |
|------|-------------------------------------------------------------------------------------------------------------------------------------------------------------------------------------------------------------------------------------------------------------------------------------------------------------------------------------------|------------------------------------------------------------------------------------------------------------------------------------------------------------------------------------------------------------------------------------------------------------------------------------------------------------------------------------------------------------------------------------------------------------------------------------------------------------------------------------------------------------------------------------------------------------------------------------------------------------------------------------------------------------------------------------------------------------|
| [24] | Left ventricular systolic heart failure have a LVEF≤40% on echocardiography in class I II or III according to the New York Heart Association (NYHA); hospitalization incident within 6 months; clinically stable; no contraindications to cardiopulmonary test; able to exercise using telerehabilitation                                 | NYHA class IV; unstable medical conditions; history of the acute coronary syndrome within the last 40 days with LVEF ≤ 35%; percutaneous angioplasty within the last 2 weeks; coronary artery bypass grafting within the last 3 months; initiation of CRT; P or CRT; D or ICD or PM within the last six weeks; lack of ICD, CRT; P or CRT; D or PM therapy; intracardiac thrombus; rest heart rate >90/min; tachypnoea >20 breaths per minute; symptomatic and exercise; induced cardiac arrhythmia or conduction disturbances; acute myocarditis and/or pericarditis heart disease requiring surgical treatment; hypertrophic cardiomyopathy; severe pulmonary disease; uncontrolled hypertension; anemia |
| [25] | Left ventricular systolic heart failure diagnosed for 3 months with a left ventricular ejection fraction <40% on echocardiography in class II or III according to the New York Heart Association (NYHA); clinically stable and receiving an optimal and stable medication for at least 4 weeks; able to exercise using telerehabilitation | NYHA class I or IV; unstable angina; a history of an acute coronary syndrome within the last month, coronary artery bypass grafting within the last 2 months, or the initiation of cardiac resynchronization therapy (CRT) within the last year; symptomatic and/or exercise-induced cardiac arrhythmia or conduction disturbances; heart disease requiring surgical treatment; hypertrophic cardiomyopathy; severe pulmonary disease; uncontrolled hypertension; anemia; acute and/or decompensated non-cardiac disease; physical disability or neurological problems; acute or chronic inflammatory disease; cancer; severe psychiatric disorder; denied to participate                                  |
| [26] | 45-75 years; left ventricular systolic ejection fraction of <40%; VO <sub>2</sub> peak of <69% predicted for age; history of stable heart failure (NYHA Classes I-III); a stable dose of medication                                                                                                                                       | Musculoskeletal limitation; pulmonary disorders that limit exercise; existing contraindications to exercise training; patients who are already involved in an exercise program                                                                                                                                                                                                                                                                                                                                                                                                                                                                                                                             |
| [27] | 30–70 years; left ventricular ejection fraction <40% on echocardiography in class II or III according to the New York Heart Association (NYHA); peak VO <sub>2</sub> <20                                                                                                                                                                  | New York Heart Association10 Class IV, myocardial infarction or revascularization within the past 4 months, unstable angina, complex or symptomatic                                                                                                                                                                                                                                                                                                                                                                                                                                                                                                                                                        |

|      |                                                                                                                                                                                                                                                                                        |                                                                                                                                                                                                                                                                                                                                                                                                                                                   |
|------|----------------------------------------------------------------------------------------------------------------------------------------------------------------------------------------------------------------------------------------------------------------------------------------|---------------------------------------------------------------------------------------------------------------------------------------------------------------------------------------------------------------------------------------------------------------------------------------------------------------------------------------------------------------------------------------------------------------------------------------------------|
|      | ml/kg/min; clinically stable and receiving an optimal and stable medication at least 2 months, b-blocker therapy, sleep apnoea and able to exercise telerehabilitation                                                                                                                 | ventricular arrhythmias, obstructive aortic or mitral valvular disease, hypertrophic cardiomyopathy, abnormal exercise testing, hypotension, pulmonary arterial pressure 50mmHg, COPD, physical or psychiatric disease                                                                                                                                                                                                                            |
| [28] | Diagnosed heart failure classified NYHA class III, left ventricle ejection fraction $\leq 35\%$ , planned implantation of a CRT-D device, controlled hypertension, diabetes, and other metabolic disorders, capacity to perform treadmill exercise test, absence of complex arrhythmia | Acute or uncontrolled disorders other than CHF and severe mobility impairment; severe musculoskeletal conditions which preclude physical rehabilitation planned cardiac surgery or percutaneous coronary interventions, cardiac surgery or coronary angioplasty within last 3 months, acute coronary syndrome, stroke or TIA within last 6 months, venous thrombosis or pulmonary embolism in the past, significant valve, and pulmonary diseases |

### EFFECT OF TR ON $\dot{V}O_2$

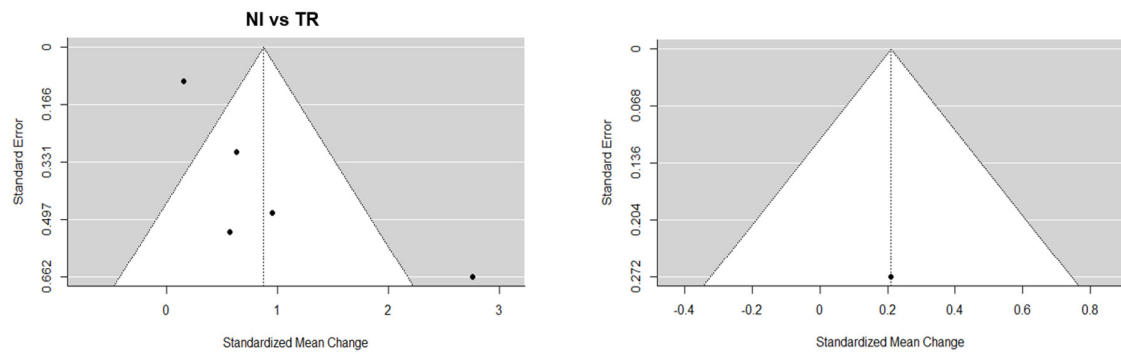

### EFFECT OF TR ON 6MWT

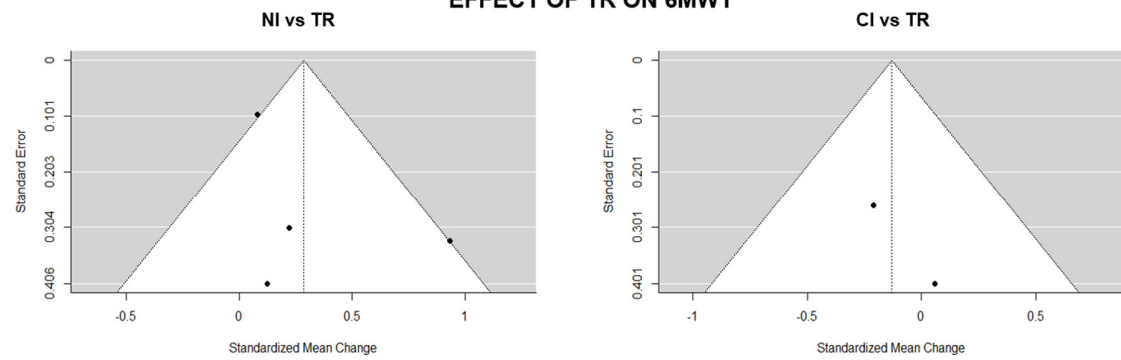

### EFFECT OF TR ON QoL

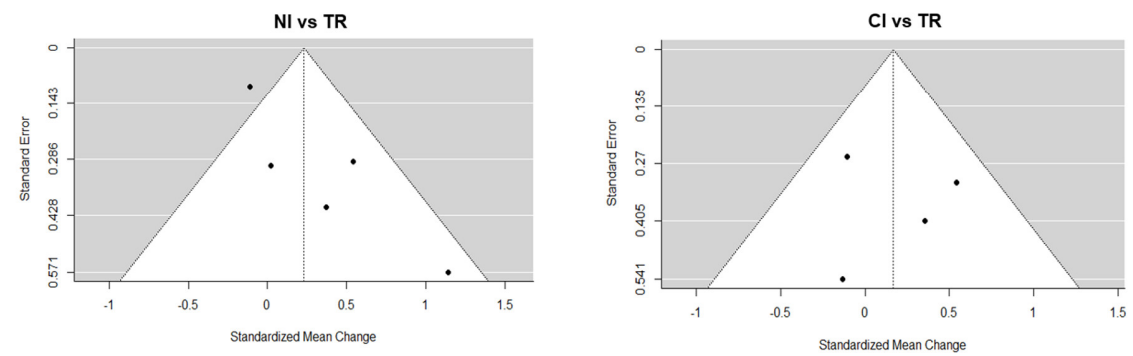

**Figure S1.** Meta-analysis funnel plots.
